# Supplementary material for: SiO2-stabilized Ni/t-ZrO2 catalysts with ordered mesopores: one-pot synthesis and their superior catalytic performance in CO methanation
Source: Royal Society of Chemistry journal article supplement (doi:10.1039/c5cy01482d), 2015-12-17
Supplement: c5cy01482d1.pdf [file c5cy01482d1.pdf]

## Electronic supplementary information

# SiO<sub>2</sub>-Stabilized Ni/t-ZrO<sub>2</sub> Catalysts with Ordered Mesopores: One-pot Synthesis and Their Superior Catalytic Performance in CO Methanation

Xiaoyan Wang <sup>a,b</sup>, Qing Liu <sup>b</sup>, Jiaying Jiang <sup>a,\*</sup> Guojing Jin <sup>b</sup>,

Huifang Li <sup>b</sup>, Fangna Gu <sup>b,\*</sup>, Guangwen Xu <sup>b</sup>, Ziyi Zhong <sup>c</sup> and Fabing Su <sup>b,\*</sup>

<sup>a</sup> *School of Materials Science and Engineering, Shaanxi Normal University, Xi'an, Shaanxi, 710062, China*

<sup>b</sup> *State Key Laboratory of Multiphase Complex Systems, Institute of Process Engineering, Chinese Academy of Sciences, Beijing 100190, China*

<sup>c</sup> *School of Chemical & Biomedical Engineering, Nanyang Technological University (NTU), 62 Nanyang Drive, Singapore 637459*

## Content

---

| Item              | Page |
|-------------------|------|
| <b>Figure. S1</b> | 2    |
| <b>Figure. S2</b> | 2    |
| <b>Figure. S3</b> | 3    |

---

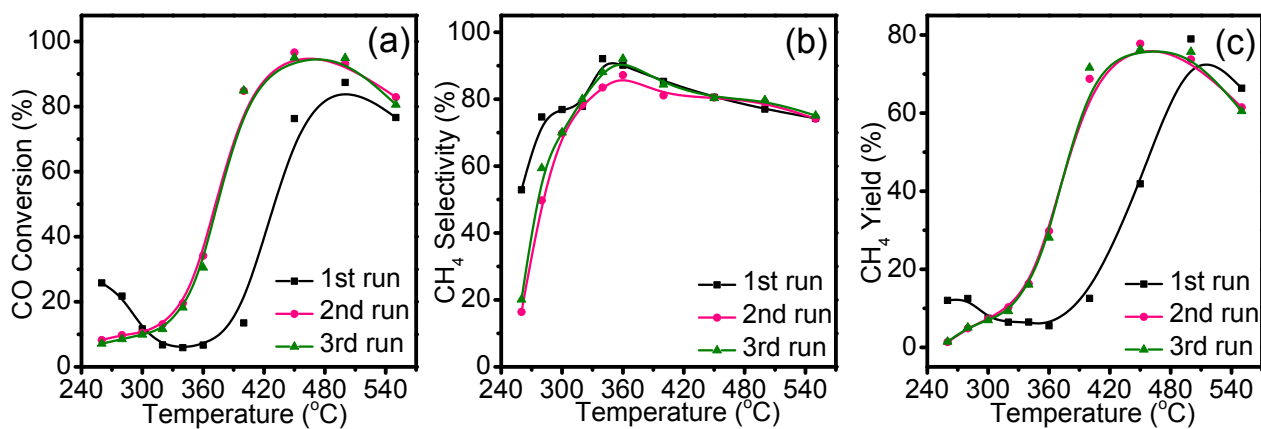

**Figure S1.** Catalytic properties of the 20NiZ-t: (a) CO conversion, (b) CH<sub>4</sub> selectivity and (c) CH<sub>4</sub> yield. Feed gas composition: 20 vol % CO, 60 vol % H<sub>2</sub>, N<sub>2</sub> balance, WHSV = 30000 mL g<sup>-1</sup> h<sup>-1</sup>.

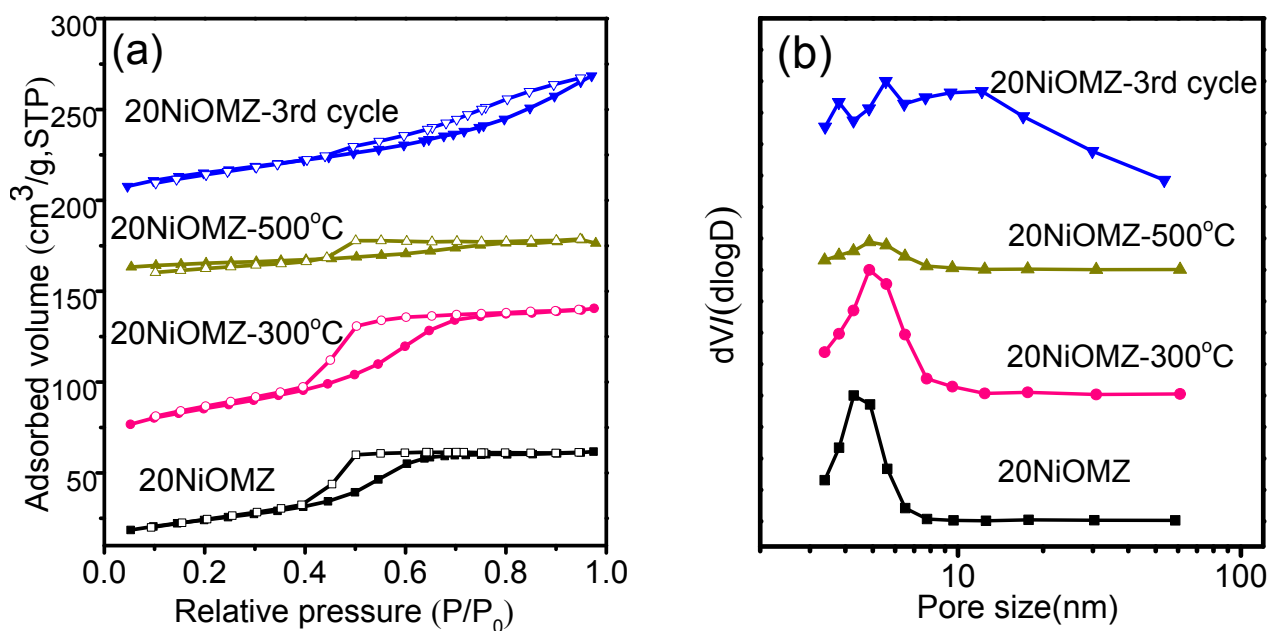

**Figure S2.** N<sub>2</sub> adsorption isotherms (a) and PSD curves (b) of the fresh catalysts and the deactivation catalysts (For clarity, the isotherms, 20NiOMZ-300 °C, 20NiOMZ-500 °C, 20NiOMZ-3rd cycle was vertically shifted for 60, 150, 200 cm<sup>3</sup> g<sup>-1</sup>, respectively).

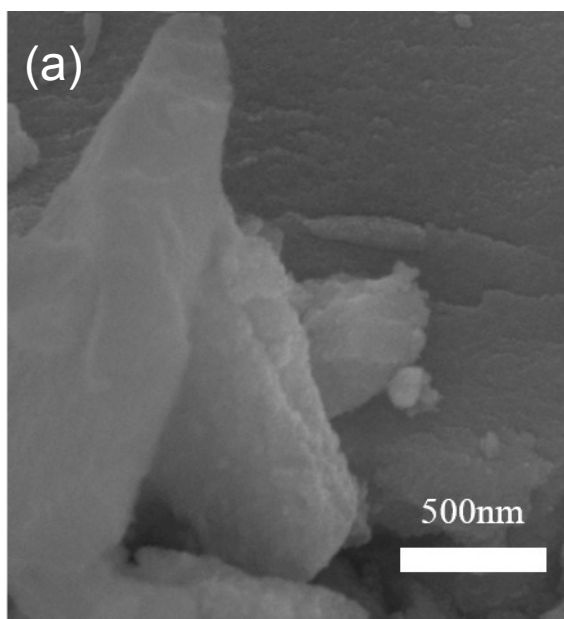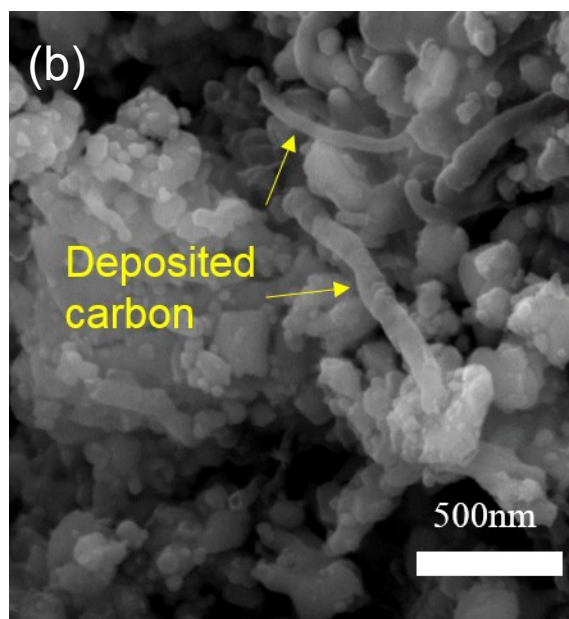

**Figure S3.** SEM images of used catalysts: (a) 20NiOM3ZS, (b) 20NiZ-m.
